# Supplementary material
Source: PubMed Central journal article supplement (PMC7539769)
Supplement: ajcr0010-2768-f8.pdf [file ajcr0010-2768-f8.pdf]

## RPS3A correlates with tumor immune infiltration and prognosis in HCC

**Table S1.** Sequences of primers used in the PCR array

| Gene name | MT   | Length | Sequence                                                                     |
|-----------|------|--------|------------------------------------------------------------------------------|
| CD276     | 81.7 | 117    | forward 5'-TCTCCAAGGATGCGATACAC-3'<br>reverse 5'-GTTGTGGGTGGTCTGTTTCATT-3'   |
| LGALS9    | 79.9 | 84     | forward 5'-CCACCTGACCAGAGTGTTC-3'<br>reverse 5'-GTGCCAACAAGCATTTTCATT-3'     |
| CTLA4     | 82.7 | 136    | forward 5'-TTGTGCTGAGTTGGTGTG-3'<br>reverse 5'-CTGGAGTAAGCCATTGTCTTC-3'      |
| LAG3      | 84.3 | 82     | forward 5'-ACTGGAGACAATGGCGACT-3'<br>reverse 5'-GATGGATATGGCAGGTGTAGG-3'     |
| CD86      | 82.9 | 105    | forward 5'-CCTCTGTCAGGGTCAGTA AGG-3'<br>reverse 5'-TCCAGGTTCTATCTCTGCCTC-3'  |
| CD48      | 79.3 | 82     | forward 5'-TAAGGTCCAGAAAGAGGACAA-3'<br>reverse 5'-CTTGATCTTCCATTCTTGCTC-3'   |
| HAVCR2    | 83.1 | 169    | forward 5'-CCAACAGAGTTACCCAACCCAG-3'<br>reverse 5'-CCTCAGCACCCAGTTTTCCCTA-3' |
| PDCD1     | 80.3 | 69     | forward 5'-TTCCACATACCTCAAGTCCAA-3'<br>reverse 5'-GGCGACCCCATAGATGATT-3'     |
| TIGIT     | 81.8 | 133    | forward 5'-ATCTGCCCTCAAGAACTTACA-3'<br>reverse 5'-CCTATGCCAACTACCTCACC-3'    |
| RPS3A     | 78   | 107    | forward 5'-AAAAGGGAGCCAAGAAGAA-3'<br>reverse 5'-GACGAGCGTCTTTCCAATAT-3'      |
| GAPDH     | 86   | 158    | forward 5'-ACAGGCAACTTGGCAAATC-3'<br>reverse 5'-AAGGGCAGGAGTAAAGGTCAG-3'     |

## RPS3A correlates with tumor immune infiltration and prognosis in HCC

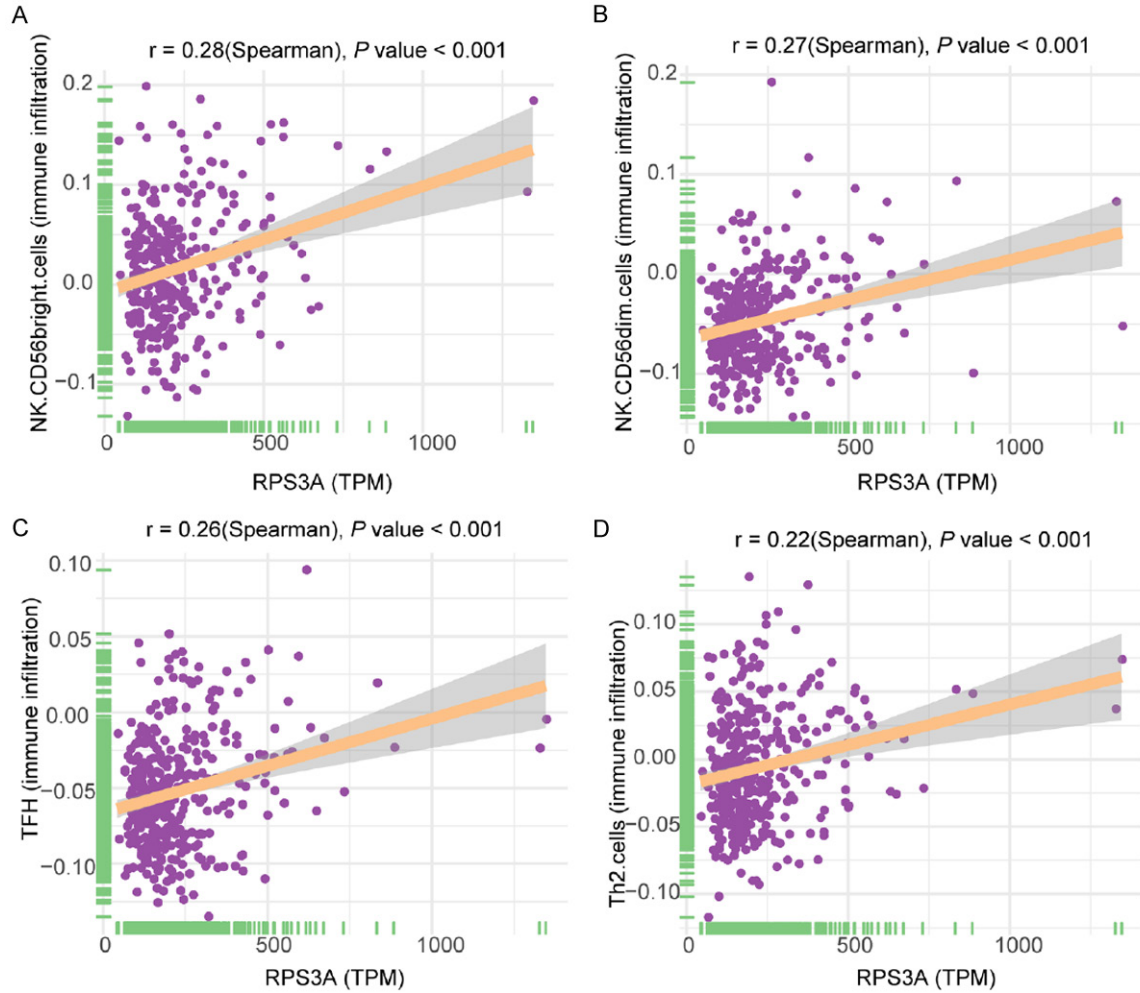

**Figure S1.** Correlation of RPS3A expression with the HCC infiltration of NK CD56<sup>bright</sup> cells (A), NK CD56<sup>dim</sup> cells (B), T follicular helper cells (C), and Th2 cells (D).

**Table S2.** Relationship between tumor RPS3A expression and immune checkpoint molecules expression in HCC patients in TCGA (n = 356)

| Gene name | Gene name | r        | P value  |
|-----------|-----------|----------|----------|
| RPS3A     | CD276     | 0.363217 | 1.53E-12 |
| RPS3A     | LGALS9    | 0.216578 | 3.77E-05 |
| RPS3A     | CTLA4     | 0.213689 | 4.81E-05 |
| RPS3A     | LAG3      | 0.212769 | 5.19E-05 |
| RPS3A     | CD86      | 0.195671 | 0.000203 |
| RPS3A     | CD48      | 0.187006 | 0.000389 |
| RPS3A     | HAVCR2    | 0.184702 | 0.00046  |
| RPS3A     | PDCD1     | 0.17371  | 0.000998 |
| RPS3A     | TIGIT     | 0.169156 | 0.001358 |
| RPS3A     | CD274     | 0.100316 | 0.058642 |
| RPS3A     | CD80      | 0.080507 | 0.129491 |
| RPS3A     | CD244     | 0.078762 | 0.138033 |
| RPS3A     | BTLA      | 0.06285  | 0.236868 |
| RPS3A     | IDO1      | 0.040675 | 0.444228 |
| RPS3A     | CD47      | 0.033558 | 0.527955 |

## RPS3A correlates with tumor immune infiltration and prognosis in HCC

|       |          |          |          |
|-------|----------|----------|----------|
| RPS3A | PVR      | -0.0074  | 0.88928  |
| RPS3A | TNFRSF14 | -0.0585  | 0.270967 |
| RPS3A | SIRPA    | -0.06327 | 0.233741 |
| RPS3A | CD160    | -0.07341 | 0.166922 |
| RPS3A | CEACAM1  | -0.30193 | 6.13E-09 |

Spearman correlation test was used to determine the relationship between RPS3A expression and immune checkpoint molecules expression levels.

**Table S3.** Correlation of tumor RPS3A expression with clinicopathologic characteristics of 154 HCC patients

| Characteristics        |          | Patients    | RPS3A expression |               | P      |
|------------------------|----------|-------------|------------------|---------------|--------|
|                        |          | Number (%)  | Low (n = 75)     | High (n = 79) |        |
| Age, years             | ≤ 50     | 64 (41.56)  | 32               | 32            | 0.87   |
|                        | > 50     | 90 (58.44)  | 43               | 47            |        |
| Gender                 | Female   | 18 (11.69)  | 7                | 11            | 0.456  |
|                        | Male     | 136 (88.31) | 68               | 68            |        |
| HBsAg                  | Negative | 26 (16.88)  | 14               | 12            | 0.668  |
|                        | Positive | 128 (83.12) | 61               | 67            |        |
| AFP, ng/ml             | ≤ 20     | 57 (37.01)  | 36               | 21            | 0.008* |
|                        | > 20     | 97 (62.99)  | 39               | 58            |        |
| CEA, ng/ml             | ≤ 5      | 141 (91.56) | 71               | 70            | 0.248  |
|                        | > 5      | 13 (8.44)   | 4                | 9             |        |
| CA19-9, U/ml           | ≤ 36     | 120 (77.92) | 63               | 57            | 0.084  |
|                        | > 36     | 34 (22.08)  | 12               | 22            |        |
| Ascites                | Absent   | 145 (94.16) | 70               | 75            | 0.741  |
|                        | Present  | 9 (5.84)    | 5                | 4             |        |
| Liver cirrhosis        | No       | 24 (15.58)  | 17               | 7             | 0.025* |
|                        | Yes      | 130 (84.42) | 58               | 72            |        |
| Tumor number           | Single   | 128 (83.12) | 61               | 67            | 0.668  |
|                        | Multiple | 26 (16.88)  | 14               | 12            |        |
| Tumor size, cm         | ≤ 5      | 77 (50.00)  | 38               | 39            | 1      |
|                        | > 5      | 77 (50.00)  | 37               | 40            |        |
| Tumor encapsulation    | Complete | 86 (55.84)  | 43               | 43            | 0.747  |
|                        | None     | 68 (44.16)  | 32               | 36            |        |
| Tumor differentiation  | I-II     | 97 (62.99)  | 53               | 44            | 0.067  |
|                        | III-IV   | 57 (37.01)  | 22               | 35            |        |
| Microvascular invasion | Absent   | 89 (57.79)  | 46               | 43            | 0.418  |
|                        | Present  | 65 (42.21)  | 29               | 36            |        |
| ALT, U/L               | ≤ 40     | 92 (59.74)  | 49               | 43            | 0.191  |
|                        | > 40     | 62 (40.26)  | 26               | 36            |        |
| AST, U/L               | ≤ 37     | 109 (70.78) | 60               | 49            | 0.021* |
|                        | > 37     | 45 (29.22)  | 15               | 30            |        |
| BCLC stage             | 0+A      | 78 (50.65)  | 40               | 38            | 0.524  |
|                        | B+C      | 76 (49.35)  | 35               | 41            |        |
| TNM stage              | I+II     | 117 (75.97) | 56               | 61            | 0.851  |
|                        | III+IV   | 37 (24.03)  | 19               | 18            |        |

\*P value < 0.05 was considered statistically significant. P values were calculated using the Pearson chi-square test.
